# Supplementary material for: Clinical and Histopathologic Features of a Feline SARS-CoV-2 Infection Model Are Analogous to Acute COVID-19 in Humans
Source: MDPI journal article supplement (doi:10.3390/v13081550), 2021-08-05
Supplement: s1 [file s1]

*Supplementary Materials*

# Clinical and Histopathologic Features of a Feline SARS-CoV-2 Infection Model Are Analogous to Acute COVID-19 in Humans

Jennifer M. Rudd <sup>1</sup>, Miruthula Tamil Selvan <sup>1</sup>, Shannon Cowan <sup>1</sup>, Yun-Fan Kao <sup>1</sup>, Cecily C. Midkiff <sup>2</sup>, Sai Narayanan <sup>3</sup>, Akhilesh Ramachandran <sup>3</sup>, Jerry W. Ritchey <sup>1</sup> and Craig A. Miller <sup>1,\*</sup>

- <sup>1</sup> Department of Veterinary Pathobiology, College of Veterinary Medicine, Oklahoma State University, Stillwater, OK 74078, USA; jennifer.rudd@okstate.edu (J.M.R.); mtamils@ostatemail.okstate.edu (M.T.S.); shannon.r.cowan@okstate.edu (S.C.); vertoiseaux@gmail.com (Y.-F.K.); jerry.ritchey@okstate.edu (J.W.R.)
- <sup>2</sup> Division of Comparative Pathology, Tulane National Primate Research Center, Tulane University, Covington, LA 70433, USA; cconerly@tulane.edu
- <sup>3</sup> Oklahoma Animal Disease Diagnostic Laboratory, College of Veterinary Medicine, Oklahoma State University, Stillwater, OK 74078, USA; rakhile@okstate.edu (A.R.); ssankar@okstate.edu (S.N.)
- \* Correspondence: craig.miller@okstate.edu

**Citation:** Rudd, J.M.; Tamil Selvan, M.; Cowan, S.; Kao, Y-F.; Midkiff, C.C.; Ramachandran, A.; Narayanan, S.; Ritchey, J.W.; Miller, C.A. Clinical and Histopathologic Features of a Feline SARS-CoV-2 Infection Model Are Analogous to Acute COVID-19 in Humans. *Viruses* **2021**, *13*, 1550. <https://doi.org/10.3390/v13081550>

Academic Editor(s): Francisco Javier Salguero

Received: 10 July 2021

Accepted: 2 August 2021

Published: 10 August 2021

**Publisher's Note:** MDPI stays neutral with regard to jurisdictional claims in published maps and institutional affiliations.

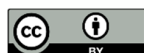

**Copyright:** © 2021 by the authors. Licensee MDPI, Basel, Switzerland. This article is an open access article distributed under the terms and conditions of the Creative Commons Attribution (CC BY) license (<http://creativecommons.org/licenses/by/4.0/>).

**Table S1. Clinical Scoring Data Summary.** (A) Total number of cats from each group exhibiting clinical signs during the 8-day study. (B) Total clinical scores recorded each day per individual cat. Statistical analysis and raw scoring data for each day is included in Supporting Information.

| <b>A.</b>                                                    |                          |  |  |  |  |                                   |  |  |  |  |
|--------------------------------------------------------------|--------------------------|--|--|--|--|-----------------------------------|--|--|--|--|
| <b>Total # Cats with Specific Clinical Sign During Study</b> |                          |  |  |  |  |                                   |  |  |  |  |
| <b>Clinical Sign</b>                                         | <b>PBS(<i>n</i> = 6)</b> |  |  |  |  | <b>SARS-CoV-2 (<i>n</i> = 12)</b> |  |  |  |  |
| Weight loss                                                  | 1                        |  |  |  |  | 5                                 |  |  |  |  |
| Reduced activity                                             | 0                        |  |  |  |  | 12                                |  |  |  |  |
| Altered behavior                                             | 0                        |  |  |  |  | 7                                 |  |  |  |  |
| Hyperthermia                                                 | 0                        |  |  |  |  | 8                                 |  |  |  |  |
| Tachypnea or Dyspnea                                         | 0                        |  |  |  |  | 12                                |  |  |  |  |
| Ocular or Nasal Discharge                                    | 0                        |  |  |  |  | 0                                 |  |  |  |  |
| Coughing/Wheezing                                            | 0                        |  |  |  |  | 4                                 |  |  |  |  |

  

| <b>B.</b>                                             |              |              |              |              |              |              |              |              |              |                            |
|-------------------------------------------------------|--------------|--------------|--------------|--------------|--------------|--------------|--------------|--------------|--------------|----------------------------|
| <b>Total Clinical Score (Sum of Parameter Scores)</b> |              |              |              |              |              |              |              |              |              |                            |
| <b>Animal ID</b>                                      | <b>Day 0</b> | <b>Day 1</b> | <b>Day 2</b> | <b>Day 3</b> | <b>Day 4</b> | <b>Day 5</b> | <b>Day 6</b> | <b>Day 7</b> | <b>Day 8</b> | <b>Peak Clinical Score</b> |
| Control 1 (0109)                                      | 0            | 0            | 0            | 0            | 0            | -            | -            | -            | -            | 0                          |
| Control 2 (0575)                                      | 0            | 0            | 0            | 0            | 0            | -            | -            | -            | -            | 0                          |
| Control 3 (0664)                                      | 0            | 0            | 0            | 0            | 0            | -            | -            | -            | -            | 0                          |
| Control 4 (1024)                                      | 0            | 0            | 0            | 0            | 0            | 0            | 0            | 0            | 0            | 0                          |
| Control 5 (0923)                                      | 0            | 0            | 0            | 0            | 0            | 0            | 0            | 0            | 0            | 0                          |
| Control 6 (0907)                                      | 0            | 0            | 0            | 0            | 0            | 1            | 0            | 0            | 0            | 0                          |
| Infected 1 (9491)                                     | 0            | 0            | 0            | 0            | 2            | -            | -            | -            | -            | 2                          |
| Infected 2 (0613)                                     | 0            | 3            | 3            | 2            | 2            | -            | -            | -            | -            | 3                          |
| Infected 3 (9687)                                     | 0            | 0            | 0            | 0            | 2            | -            | -            | -            | -            | 2                          |
| Infected 4 (9857)                                     | 0            | 0            | 0            | 0            | 2            | -            | -            | -            | -            | 2                          |
| Infected 5 (0452)                                     | 0            | 0            | 2            | 7            | 7            | -            | -            | -            | -            | 7                          |
| Infected 6 (1474)                                     | 0            | 1            | 5            | 3            | 6            | -            | -            | -            | -            | 6                          |
| Infected 7 (1440)                                     | 0            | 1            | 0            | 0            | 6            | 4            | 2            | 2            | 3            | 6                          |
| Infected 8 (0800)                                     | 0            | 2            | 0            | 0            | 2            | 4            | 2            | 3            | 2            | 4                          |
| Infected 9 (0559)                                     | 0            | 2            | 2            | 1            | 9            | 4            | 3            | 6            | 6            | 9                          |
| Infected 10 (1130)                                    | 0            | 0            | 0            | 3            | 2            | 5            | 2            | 2            | 2            | 5                          |
| Infected 11 (0095)                                    | 0            | 0            | 1            | 0            | 2            | 1            | 2            | 2            | 3            | 3                          |
| Infected 12 (0842)                                    | 0            | 1            | 1            | 0            | 2            | 2            | 2            | 2            | 2            | 2                          |

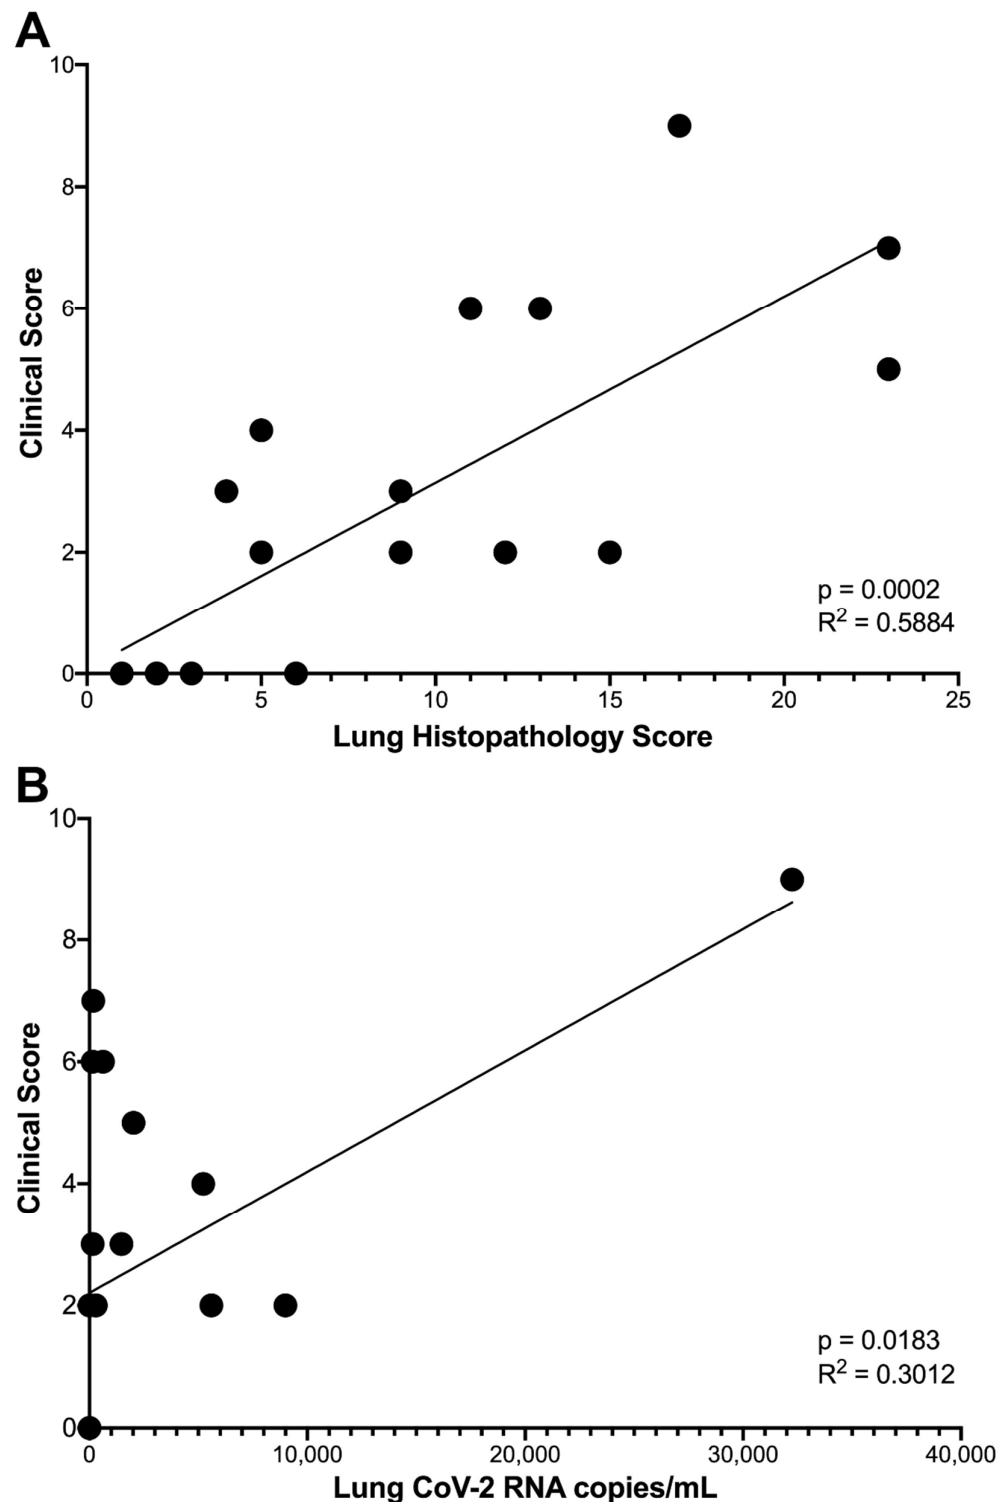

**Figure S1. Positive linear correlation between histopathologic score and peak clinical score.** (A) A positive linear correlation exists between more severe histologic scores from analyzed lung tissue and peak clinical score identified in infected cats. Cats with more severe clinical disease were also more likely to have more severe pulmonary pathology at the time of necropsy.  $p = 0.0002$ ;  $R^2 = 0.5884$ . (B) This graph details the correlation between peak clinical score and lung SARS-CoV-2 RNA viral load. This correlation was significant ( $p = 0.0183$ ), but the measure of fit was below 50% for variance ( $R^2 = 0.3012$ ). Data was analyzed via Pearson Correlation (Table S2).

**Table S2. Lung tissue histopathology scores based on pathologic features reported in human COVID-19 patients [1–4].** All tissues were assigned a quantitative histologic score of 0–4 based on previously documented criteria [5,6]. Lung tissues were scored as described in methods by a board-certified veterinary anatomic pathologist blinded to study groups. Histopathologic scores were analyzed using two-way ANOVA and Tukey’s multiple comparison test.

|            | Cat ID | Alveolar Damage | Alveolar Fibrin | Serous Exudate/ Pulmonary Edema | Perivascular Infiltrates | Alveolar Histiocytosis | Type II Pneumocyte Hyperplasia | Syn-cytia | Throm-bosis | Vascu-litis | Total Histo-pathology Score |
|------------|--------|-----------------|-----------------|---------------------------------|--------------------------|------------------------|--------------------------------|-----------|-------------|-------------|-----------------------------|
| Uninfected | 0109   | 0               | 0               | 1                               | 1                        | 1                      | 0                              | 0         | 0           | 0           | 3                           |
|            | 0575   | 0               | 0               | 0                               | 0                        | 1                      | 0                              | 0         | 0           | 0           | 1                           |
|            | 0664   | 0               | 0               | 1                               | 1                        | 0                      | 0                              | 0         | 0           | 0           | 2                           |
|            | 0907   | 0               | 0               | 1                               | 0                        | 1                      | 0                              | 0         | 0           | 0           | 2                           |
|            | 0923   | 0               | 0               | 1                               | 2                        | 2                      | 1                              | 0         | 0           | 0           | 6                           |
|            | 1024   | 0               | 0               | 0                               | 1                        | 1                      | 0                              | 0         | 0           | 0           | 2                           |
| Day 4 p.i. | 0452   | 3               | 3               | 4                               | 4                        | 4                      | 3                              | 2         | 0           | 0           | 23                          |
|            | 0613   | 0               | 0               | 2                               | 2                        | 0                      | 0                              | 0         | 0           | 0           | 4                           |
|            | 1474   | 2               | 0               | 0                               | 3                        | 4                      | 2                              | 2         | 0           | 0           | 13                          |
|            | 9491   | 2               | 0               | 4                               | 3                        | 3                      | 0                              | 0         | 0           | 0           | 12                          |
|            | 9687   | 2               | 0               | 1                               | 3                        | 3                      | 0                              | 0         | 0           | 0           | 9                           |
|            | 9857   | 3               | 2               | 3                               | 3                        | 4                      | 0                              | 0         | 0           | 0           | 15                          |
| Day 8 p.i. | 0095   | 1               | 0               | 2                               | 3                        | 3                      | 0                              | 0         | 0           | 0           | 9                           |
|            | 0559   | 2               | 2               | 4                               | 3                        | 4                      | 0                              | 0         | 2           | 1           | 17                          |
|            | 0800   | 0               | 0               | 1                               | 1                        | 1                      | 0                              | 0         | 2           | 0           | 5                           |
|            | 0842   | 0               | 0               | 2                               | 1                        | 2                      | 0                              | 0         | 0           | 0           | 5                           |
|            | 1130   | 3               | 2               | 4                               | 4                        | 4                      | 3                              | 3         | 0           | 2           | 23                          |
|            | 1440   | 1               | 1               | 3                               | 3                        | 3                      | 0                              | 0         | 0           | 0           | 11                          |

p.i. = post infection.

**Table S3. Total SARS-CoV-2 viral RNA and fACE2 RNA (copy number/mL) detected in each tissue type.** ANOVA was used to compare differences in SARS-CoV-2 viral load and ACE2 RNA among uninfected and SARS-CoV-2-infected individuals, between sample type, for each tissue individually, and between tissues. RNA copy number per mL and statistical analysis are reported in the above table. TBLN = tracheobronchial lymph node. Vertical text in 1st column indicates group.

|            | Cat ID | CoV-2 Viral RNA Copies/mL |         |                 |        |         | ACE2 RNA Copies/mL |        |                |         |      |
|------------|--------|---------------------------|---------|-----------------|--------|---------|--------------------|--------|----------------|---------|------|
|            |        | Nasal Turbi-nates         | TB LN   | Distal Tra-chea | Kidney | Lung    | Nasal Turbinates   | TB LN  | Distal Trachea | Kidney  | Lung |
| Uninfected | 0109   | 0                         | 0       | 0               | 0      | 0       | 4178               | 0      | 1511           | 42,667  | 133  |
|            | 0575   | 0                         | 0       | 0               | 0      | 0       | 138,889            | 0      | 133            | 32,667  | 778  |
|            | 0664   | 0                         | 0       | 0               | 0      | 0       | 3956               | 0      | 1711           | 189,333 | 0    |
|            | 0907   | 0                         | 0       | 0               | 0      | 0       | 3200               | 311    | 0              | 192,000 | 578  |
|            | 0923   | 0                         | 0       | 0               | 0      | 0       | 1578               | 1111   | 533            | 147,778 | 0    |
|            | 1024   | 0                         | 0       | 0               | 0      | 0       | 4489               | 0      | 133            | 51,778  | 0    |
| Day 4 p.i. | 0452   | 2755                      | 214,666 | 7333            | 267    | 488,667 | 778                | 178    | 0              | 242,444 | 0    |
|            | 0613   | 378                       | 244     | 14,444          | 3178   | 3778    | 667                | 0      | 133            | 263,111 | 133  |
|            | 1474   | 1622                      | 524,444 | 178             | 1400   | 594,889 | 1289               | 0      | 467            | 189,556 | 533  |
|            | 9491   | 104,667                   | 1889    | 0               | 622    | 1489    | 733                | 0      | 133            | 282,000 | 133  |
|            | 9687   | 16,000                    | 253,555 | 2445            | 1644   | 866     | 64,889             | 0      | 400            | 833,333 | 0    |
|            | 9857   | 47,111                    | 8889    | 4334            | 489    | 503,778 | 25,333             | 267    | 0              | 206,667 | 0    |
| Day 8 p.i. | 0095   | 0                         | 226,666 | 32,000          | 1755   | 1133    | 2644               | 422    | 133            | 148,222 | 0    |
|            | 0559   | 178                       | 384,445 | 200             | 222    | 28,666  | 2356               | 0      | 0              | 150,667 | 0    |
|            | 0800   | 712                       | 22,667  | 63,778          | 1711   | 8000    | 8222               | 10,444 | 267            | 129,333 | 667  |
|            | 0842   | 956                       | 189,556 | 0               | 2889   | 778     | 156                | 2600   | 133            | 65,556  | 0    |
|            | 1130   | 11,111                    | 334,000 | 600             | 1889   | 9267    | 1000               | 0      | 267            | 76,222  | 133  |
|            | 1440   | 3755                      | 768,889 | 24,000          | 644    | 6444    | 1822               | 133    | 0              | 58,444  | 0    |

\* TB LN = tracheobronchial lymph node, p.i. = post infection

**Table S4. Relationship between feline ACE2 expression and tissue type** (Kruskal-Wallis test). (A) Sham-inoculated control animals; (B) SARS-CoV-2-infected animals, 4 days post infection (dpi); (C) SARS-CoV-2-infected animals, 8 dpi. \*  $p < 0.05$ ; \*\*  $p < 0.01$ ; \*\*\*  $p < 0.001$ ; \*\*\*\*  $p < 0.0001$ , ns = not-significant

| <b>A. Uninfected Control Animals (n = 6): ACE2 RNA Expression by Tissue Type</b>              |                        |                     |                        |                |           |          |
|-----------------------------------------------------------------------------------------------|------------------------|---------------------|------------------------|----------------|-----------|----------|
| <b>Kruskal-Wallis Test</b>                                                                    | <b>Mean rank diff.</b> | <b>Significant?</b> | <b>Summary</b>         | <b>P value</b> |           |          |
| Nasal Turbinates vs. TbLn                                                                     | 14.17                  | Yes                 | **                     | 0.0049         |           |          |
| Nasal Turbinates vs. Distal Trachea                                                           | 9.583                  | No                  | ns                     | 0.0569         |           |          |
| Nasal Turbinates vs. Kidney                                                                   | −5.167                 | No                  | ns                     | 0.3046         |           |          |
| Nasal Turbinates vs. Lung                                                                     | 13.08                  | Yes                 | **                     | 0.0093         |           |          |
| TbLn vs. Distal Trachea                                                                       | −4.583                 | No                  | ns                     | 0.3624         |           |          |
| TbLn vs. Kidney                                                                               | −19.33                 | Yes                 | ***                    | 0.0001         |           |          |
| TbLn vs. Lung                                                                                 | −1.083                 | No                  | ns                     | 0.8296         |           |          |
| Distal Trachea vs. Kidney                                                                     | −14.75                 | Yes                 | **                     | 0.0034         |           |          |
| Distal Trachea vs. Lung                                                                       | 3.5                    | No                  | ns                     | 0.4868         |           |          |
| Kidney vs. Lung                                                                               | 18.25                  | Yes                 | ***                    | 0.0003         |           |          |
| <b>Test details</b>                                                                           | <b>Mean rank 1</b>     | <b>Mean rank 2</b>  | <b>Mean rank diff.</b> | <b>n1</b>      | <b>n2</b> | <b>Z</b> |
| Nasal Turbinates vs. TbLn                                                                     | 21.83                  | 7.667               | 14.17                  | 6              | 6         | 2.815    |
| Nasal Turbinates vs. Distal Trachea                                                           | 21.83                  | 12.25               | 9.583                  | 6              | 6         | 1.904    |
| Nasal Turbinates vs. Kidney                                                                   | 21.83                  | 27                  | −5.167                 | 6              | 6         | 1.027    |
| Nasal Turbinates vs. Lung                                                                     | 21.83                  | 8.75                | 13.08                  | 6              | 6         | 2.6      |
| TbLn vs. Distal Trachea                                                                       | 7.667                  | 12.25               | −4.583                 | 6              | 6         | 0.9107   |
| TbLn vs. Kidney                                                                               | 7.667                  | 27                  | −19.33                 | 6              | 6         | 3.842    |
| TbLn vs. Lung                                                                                 | 7.667                  | 8.75                | −1.083                 | 6              | 6         | 0.2153   |
| Distal Trachea vs. Kidney                                                                     | 12.25                  | 27                  | −14.75                 | 6              | 6         | 2.931    |
| Distal Trachea vs. Lung                                                                       | 12.25                  | 8.75                | 3.5                    | 6              | 6         | 0.6955   |
| Kidney vs. Lung                                                                               | 27                     | 8.75                | 18.25                  | 6              | 6         | 3.626    |
| <b>B. SARS-CoV-2-Infected Animals, Day 4 p.i. (n = 6): ACE2 RNA Expression by Tissue Type</b> |                        |                     |                        |                |           |          |
| <b>Kruskal-Wallis Test</b>                                                                    | <b>Mean rank diff.</b> | <b>Significant?</b> | <b>Summary</b>         | <b>P value</b> |           |          |
| Nasal Turbinates vs. TbLn                                                                     | 13.33                  | Yes                 | **                     | 0.0078         |           |          |
| Nasal Turbinates vs. Distal Trachea                                                           | 10.5                   | Yes                 | *                      | 0.036          |           |          |
| Nasal Turbinates vs. Kidney                                                                   | −6                     | No                  | ns                     | 0.2309         |           |          |
| Nasal Turbinates vs. Lung                                                                     | 12.17                  | Yes                 | *                      | 0.0151         |           |          |
| TbLn vs. Distal Trachea                                                                       | −2.833                 | No                  | ns                     | 0.5716         |           |          |
| TbLn vs. Kidney                                                                               | −19.33                 | Yes                 | ***                    | 0.0001         |           |          |
| TbLn vs. Lung                                                                                 | −1.167                 | No                  | ns                     | 0.8158         |           |          |
| Distal Trachea vs. Kidney                                                                     | −16.5                  | Yes                 | ***                    | 0.001          |           |          |
| Distal Trachea vs. Lung                                                                       | 1.667                  | No                  | ns                     | 0.7393         |           |          |
| Kidney vs. Lung                                                                               | 18.17                  | Yes                 | ***                    | 0.0003         |           |          |
| <b>Test details</b>                                                                           | <b>Mean rank 1</b>     | <b>Mean rank 2</b>  | <b>Mean rank diff.</b> | <b>n1</b>      | <b>n2</b> | <b>Z</b> |
| Nasal Turbinates vs. TbLn                                                                     | 21.5                   | 8.167               | 13.33                  | 6              | 6         | 2.662    |
| Nasal Turbinates vs. Distal Trachea                                                           | 21.5                   | 11                  | 10.5                   | 6              | 6         | 2.096    |
| Nasal Turbinates vs. Kidney                                                                   | 21.5                   | 27.5                | −6                     | 6              | 6         | 1.198    |
| Nasal Turbinates vs. Lung                                                                     | 21.5                   | 9.333               | 12.17                  | 6              | 6         | 2.429    |
| TbLn vs. Distal Trachea                                                                       | 8.167                  | 11                  | −2.833                 | 6              | 6         | 0.5657   |
| TbLn vs. Kidney                                                                               | 8.167                  | 27.5                | −19.33                 | 6              | 6         | 3.86     |
| TbLn vs. Lung                                                                                 | 8.167                  | 9.333               | −1.167                 | 6              | 6         | 0.2329   |
| Distal Trachea vs. Kidney                                                                     | 11                     | 27.5                | −16.5                  | 6              | 6         | 3.294    |
| Distal Trachea vs. Lung                                                                       | 11                     | 9.333               | 1.667                  | 6              | 6         | 0.3328   |
| Kidney vs. Lung                                                                               | 27.5                   | 9.333               | 18.17                  | 6              | 6         | 3.627    |
| <b>C. SARS-CoV-2-Infected Animals, Day 8 p.i. (n = 6): ACE2 RNA Expression by Tissue Type</b> |                        |                     |                        |                |           |          |
| <b>Kruskal-Wallis Test</b>                                                                    | <b>Mean rank diff.</b> | <b>Significant?</b> | <b>Summary</b>         | <b>P value</b> |           |          |
| Nasal Turbinates vs. TbLn                                                                     | 5.75                   | No                  | ns                     | 0.2529         |           |          |
| Nasal Turbinates vs. Distal Trachea                                                           | 9.333                  | No                  | ns                     | 0.0634         |           |          |
| Nasal Turbinates vs. Kidney                                                                   | −8.333                 | No                  | ns                     | 0.0975         |           |          |
| Nasal Turbinates vs. Lung                                                                     | 11.58                  | Yes                 | *                      | 0.0213         |           |          |
| TbLn vs. Distal Trachea                                                                       | 3.583                  | No                  | ns                     | 0.4761         |           |          |
| TbLn vs. Kidney                                                                               | −14.08                 | Yes                 | **                     | 0.0051         |           |          |
| TbLn vs. Lung                                                                                 | 5.833                  | No                  | ns                     | 0.246          |           |          |

|                                     |                    |                    |                        |           |           |          |
|-------------------------------------|--------------------|--------------------|------------------------|-----------|-----------|----------|
| Distal Trachea vs. Kidney           | −17.67             | Yes                | ***                    | 0.0004    |           |          |
| Distal Trachea vs. Lung             | 2.25               | No                 | ns                     | 0.6546    |           |          |
| Kidney vs. Lung                     | 19.92              | Yes                | ****                   | <0.0001   |           |          |
| <b>Test details</b>                 | <b>Mean rank 1</b> | <b>Mean rank 2</b> | <b>Mean rank diff.</b> | <b>n1</b> | <b>n2</b> | <b>Z</b> |
| Nasal Turbinates vs. TbLn           | 19.17              | 13.42              | 5.75                   | 6         | 6         | 1.143    |
| Nasal Turbinates vs. Distal Trachea | 19.17              | 9.833              | 9.333                  | 6         | 6         | 1.856    |
| Nasal Turbinates vs. Kidney         | 19.17              | 27.5               | −8.333                 | 6         | 6         | 1.657    |
| Nasal Turbinates vs. Lung           | 19.17              | 7.583              | 11.58                  | 6         | 6         | 2.303    |
| TbLn vs. Distal Trachea             | 13.42              | 9.833              | 3.583                  | 6         | 6         | 0.7126   |
| TbLn vs. Kidney                     | 13.42              | 27.5               | −14.08                 | 6         | 6         | 2.801    |
| TbLn vs. Lung                       | 13.42              | 7.583              | 5.833                  | 6         | 6         | 1.16     |
| Distal Trachea vs. Kidney           | 9.833              | 27.5               | −17.67                 | 6         | 6         | 3.513    |
| Distal Trachea vs. Lung             | 9.833              | 7.583              | 2.25                   | 6         | 6         | 0.4474   |
| Kidney vs. Lung                     | 27.5               | 7.583              | 19.92                  | 6         | 6         | 3.961    |

TbLn = tracheobronchial lymph node.

## References

1. Ritchey, J.W.; Levy, J.K.; Bliss, S.K.; Tompkins, W.A.; Tompkins, M.B. Constitutive expression of types 1 and 2 cytokines by alveolar macrophages from feline immunodeficiency virus-infected cats. *Vet. Immunol. Immunopathol.* **2001**, *79*, 83–100, doi:10.1016/s0165-2427(01)00250-1.
2. Polak, S.B.; Van Gool, I.C.; Cohen, D.; Jan, H.; van Paassen, J. A systematic review of pathological findings in COVID-19: A pathophysiological timeline and possible mechanisms of disease progression. *Mod. Pathol.* **2020**, *33*, 2128–2138.
3. Tian, S.; Xiong, Y.; Liu, H.; Niu, L.; Guo, J.; Liao, M.; Xiao, S.-Y. Pathological study of the 2019 novel coronavirus disease (COVID-19) through postmortem core biopsies. *Mod. Pathol.* **2020**, *33*, 1007–1014.
4. von der Thüsen, J.; van der Eerden, M. Histopathology and genetic susceptibility in COVID-19 pneumonia. *Eur. J. Clin. Invest.* **2020**, *50*, e13259.
5. Xu, Z.; Shi, L.; Wang, Y.; Zhang, J.; Huang, L.; Zhang, C.; Liu, S.; Zhao, P.; Liu, H.; Zhu, L. et al. Pathological findings of COVID-19 associated with acute respiratory distress syndrome. *Lancet Respir. Med.* **2020**, *8*, 420–422.
6. Miller, C.; Bielefeldt-Ohmann, H.; MacMillan, M.; Huitron-Resendiz, S.; Henriksen, S.; Elder, J.; VandeWoude, S. Strain-specific viral distribution and neuropathology of feline immunodeficiency virus. *Vet. Immunol. Immunop.* **2011**, *143*, 282–291.
